# Supplementary material
Source: PubMed Central journal article supplement (PMC7165451)
Supplement: pnas.1917521117.sapp.pdf [file pnas.1917521117.sapp.pdf]

# PNAS

[www.pnas.org](http://www.pnas.org)

Supplementary Information for

**Trait velocities reveal that mortality has driven widespread coordinated shifts in forest hydraulic trait composition**

A.T. Trugman, L.D.L. Anderegg, J.D. Shaw, W. R. L. Anderegg

A.T. Trugman  
Email: [att@ucsb.edu](mailto:att@ucsb.edu)

**This PDF file includes:**

Figures S1 to S3  
Tables S1 to S5

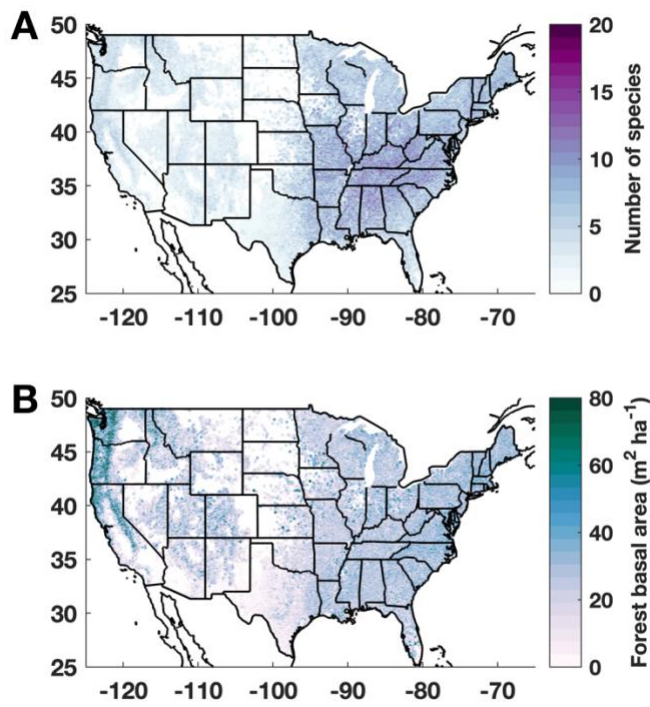

**Fig. S1:** Species diversity (**A**) and forest basal area (**B**) at the most recent census derived from the U.S. Forest Service Forest Inventory and Analysis (FIA) long-term permanent plot network.

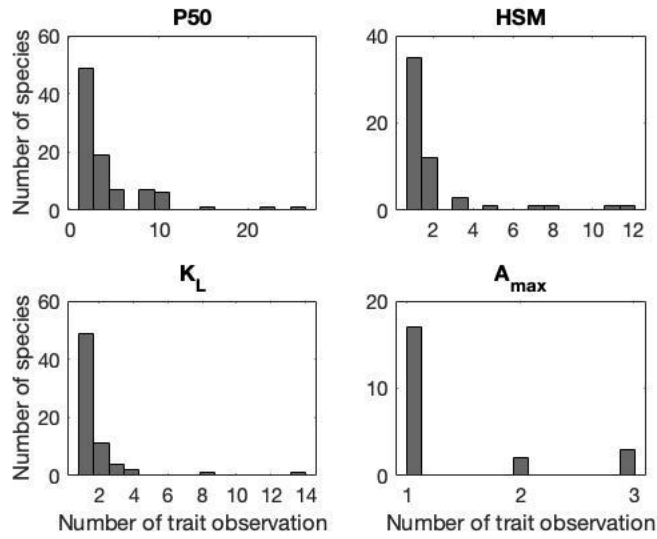

**Fig. S2.** Trait observations and species frequency of FIA species in the Xylem Functional Traits database.

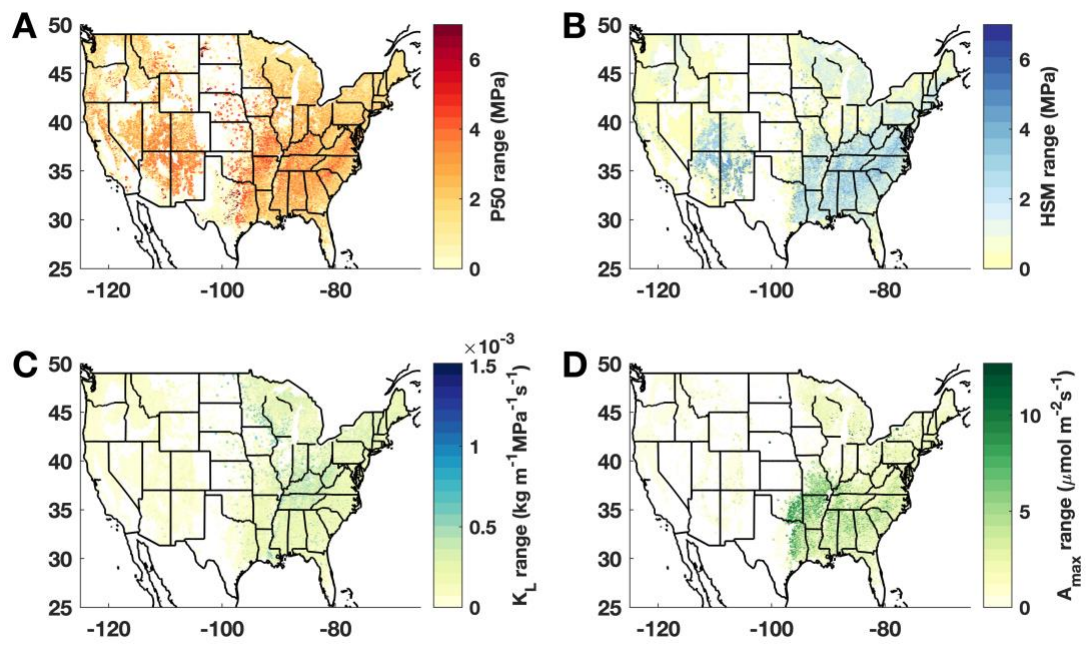

**Fig. S3:** Same as Fig. 2 except white space indicates non-forested regions or regions where trait coverage was less than 30% by stand basal area.

**Table S1:** Shifts in population mean P50 and HSM (in MPa) between the first and last inventory for different forest types and trait dataset versions including the base version (Base), phylogenetically imputed version (P-imputed), and strict quality control version (Strict Q-control). See Methods for further details. Significance values from Wilcoxon sign-ranked test are indicated in parentheses. NS indicates no significant shift in population mean.

| <b>Forest group</b>                  | <b>Base</b>                 | <b>P-imputed</b>           | <b>Strict Q-control</b>     |
|--------------------------------------|-----------------------------|----------------------------|-----------------------------|
| <b><math>\Delta P50</math> (MPa)</b> |                             |                            |                             |
| <b>Total</b>                         | -0.0097<br>( $\ll 0.0001$ ) | -0.011<br>( $\ll 0.0001$ ) | -0.0080<br>( $\ll 0.0001$ ) |
| <b>Angiosperm</b>                    | 0.0020<br>(0.017)           | 0.0018<br>( $\ll 0.0001$ ) | -0.0081<br>( $\ll 0.0001$ ) |
| <b>Gymnosperm</b>                    | -0.0196<br>( $\ll 0.0001$ ) | -0.024<br>( $\ll 0.0001$ ) | -0.0080<br>( $\ll 0.0001$ ) |
| <b><math>\Delta HSM</math> (MPa)</b> |                             |                            |                             |
| <b>Total</b>                         | NS                          | 0.018<br>( $\ll 0.0001$ )  | _____                       |
| <b>Angiosperm</b>                    | -0.0073<br>(0.030)          | 0.014<br>( $\ll 0.0001$ )  | _____                       |
| <b>Gymnosperm</b>                    | NS                          | 0.0211<br>( $\ll 0.0001$ ) | _____                       |

**Table S2:** Response coefficients and significance levels of trait velocities calculated between the first and last inventory (MPa yr<sup>-1</sup>) associated with mortality and time of final census for different forest types and regions, including eastern and western U.S., angiosperm-dominated forests, gymnosperm-dominated forests, and excluding plots dominated by trees known to suffer from major pest or pathogen mortality in recent years (piñon pine, lodgepole pine, red and white oak, eastern hemlock, and green and white ash), for trait dataset versions including the base version (Base), phylogenetically imputed version (P-imputed), and strict quality control version (Strict Q-control), with and without outliers that drive overdispersion diagnosed using Q-Q plots (OE = outliers excluded). See Methods for further details. Significance values are indicated in parentheses and NS indicates no significant association. The number of plots included in each model is detailed in Table S5.

| Forest group                      |      | Base                   | Base (OE)               | P-imputed               | P-imputed (OE)          | Strict Q-control        | Strict Q-control (OE)   |
|-----------------------------------|------|------------------------|-------------------------|-------------------------|-------------------------|-------------------------|-------------------------|
| <b>ΔP50 (MPa yr<sup>-1</sup>)</b> |      |                        |                         |                         |                         |                         |                         |
| <b>Total</b>                      | Mort | -0.000636<br>(<0.001)  | -0.000865<br>(<<0.0001) | -0.000620<br>(<0.0001)  | -0.000612<br>(<<0.0001) | -0.000774<br>(<<0.0001) | -0.00102<br>(<<0.0001)  |
|                                   | Time | -0.000342<br>(0.044)   | NS                      | -0.000314<br>(0.032)    | NS                      | NS                      | 0.000162<br>(0.021)     |
| <b>Angio</b>                      | Mort | -0.001831<br>(<0.0001) | -0.00155<br>(<<0.0001)  | -0.00162<br>(<<0.0001)  | -0.00127<br>(<<0.0001)  | -0.000776<br>(0.0026)   | -0.00130<br>(<<0.0001)  |
|                                   | Time | NS                     | 0.000400<br>(0.0025)    | NS                      | 0.000236<br>(0.033)     | 0.000552<br>(0.032)     | 0.000294<br>(0.013)     |
| <b>Gymno</b>                      | Mort | NS                     | -0.000388<br>(0.0023)   | NS                      | NS                      | -0.000762<br>(0.00018)  | -0.000830<br>(<<0.0001) |
|                                   | Time | -0.000543<br>(0.023)   | -0.000369<br>(0.0023)   | -0.000559<br>(0.0052)   | -0.000216<br>(0.028)    | -0.000549<br>(0.0066)   | NS                      |
| <b>West</b>                       | Mort | NS                     | -0.00102<br>(<<0.0001)  | NS                      | -0.00102<br>(<<0.0001)  | NS                      | -0.00112<br>(<<0.0001)  |
|                                   | Time | -0.000960<br>(0.034)   | NS                      | -0.00179<br>(<<0.0001)  | -0.000389<br>(0.013)    | NS                      | NS                      |
| <b>East</b>                       | Mort | -0.00101<br>(<<0.0001) | -0.000697<br>(<<0.0001) | -0.000696<br>(<0.0001)  | -0.000485<br>(<<0.0001) | -0.000812<br>(<<0.0001) | -0.000992<br>(<<0.0001) |
|                                   | Time | NS                     | NS                      | NS                      | NS                      | NS                      | 0.000221<br>(0.0035)    |
| <b>No Piñon</b>                   | Mort | -0.000462<br>(0.0069)  | -0.000805<br>(<<0.0001) | -0.000510<br>(<0.001)   | -0.000589<br>(<<0.0001) | -0.000437<br>(0.0035)   | -0.000986<br>(<<0.0001) |
|                                   | Time | NS                     | NS                      | NS                      | NS                      | NS                      | 0.000207<br>(0.0019)    |
| <b>No Lodgepole</b>               | Mort | -0.000582<br>(<0.001)  | -0.000855<br>(<<0.0001) | -0.000596<br>(<0.0001)  | -0.000608<br>(<<0.0001) | -0.000731<br>(<<0.0001) | -0.00100<br>(<<0.0001)  |
|                                   | Time | -0.000341<br>(0.047)   | NS                      | -0.000315<br>(0.033)    | NS                      | NS                      | 0.000156<br>(0.029)     |
| <b>No Oak</b>                     | Mort | -0.000628<br>(<0.001)  | -0.000915<br>(<<0.0001) | -0.000546<br>(<0.001)   | -0.000614<br>(<<0.0001) | -0.000792<br>(<<0.0001) | -0.00104<br>(<<0.0001)  |
|                                   | Time | -0.00041482<br>(0.021) | NS                      | -0.00036554<br>(0.021)  | NS                      | NS                      | 0.000146<br>(0.039)     |
| <b>No Hemlock</b>                 | Mort | -0.000644<br>(<0.001)  | -0.000889<br>(<<0.0001) | -0.000636<br>(<<0.0001) | -0.000627<br>(<<0.0001) | -0.000774<br>(<<0.0001) | -0.00103<br>(<<0.0001)  |
|                                   | Time | -0.000340<br>(0.047)   | NS                      | -0.000314<br>(0.034)    | NS                      | NS                      | 0.000163<br>(0.022)     |
| <b>No Ash</b>                     | Mort | -0.000649<br>(<0.001)  | -0.000879<br>(<<0.0001) | -0.000612<br>(<0.0001)  | -0.000663<br>(<<0.0001) | -0.000780<br>(<<0.0001) | -0.00102<br>(<<0.0001)  |
|                                   | Time | -0.000361<br>(0.033)   | NS                      | -0.000357<br>(0.014)    | NS                      | NS                      | 0.000160<br>(0.022)     |
| <b>ΔHSM (MPa yr<sup>-1</sup>)</b> |      |                        |                         |                         |                         |                         |                         |
| <b>Total</b>                      | Mort | 0.000833<br>(0.00082)  | 0.000594<br>(<<0.0001)  | 0.000979<br>(<<0.0001)  | 0.00109<br>(<<0.0001)   | _____                   | _____                   |
|                                   | Time | NS                     | -0.000313<br>(0.014)    | 0.000327<br>(0.036)     | NS                      | _____                   | _____                   |
| <b>Angio</b>                      | Mort | 0.00171<br>(0.00045)   | 0.001475<br>(<<0.0001)  | 0.00205<br>(<<0.0001)   | 0.00202<br>(<<0.0001)   | _____                   | _____                   |
|                                   | Time | NS                     | NS                      | NS                      | NS                      | _____                   | _____                   |

|                     |      |                       |                         |                        |                        |       |       |
|---------------------|------|-----------------------|-------------------------|------------------------|------------------------|-------|-------|
| <b>Gymno</b>        | Mort | NS                    | NS                      | NS                     | 0.000324<br>(0.0048)   | _____ | _____ |
|                     | Time | NS                    | NS                      | NS                     | 0.000221<br>(0.048)    | _____ | _____ |
| <b>West</b>         | Mort | 0.000930<br>(0.032)   | 0.000598<br>(0.00049)   | NS                     | 0.000343<br>(0.0286)   | _____ | _____ |
|                     | Time | 0.00113<br>(0.0081)   | 0.000404<br>(0.017)     | 0.00112<br>(0.00088)   | 0.000487<br>(0.0013)   | _____ | _____ |
| <b>East</b>         | Mort | 0.000755<br>(0.012)   | 0.000471<br>(0.0042)    | 0.00140<br>(<<0.0001)  | 0.00147<br>(<<0.0001)  | _____ | _____ |
|                     | Time | -0.000861<br>(0.0040) | -0.000554<br>(0.00065)  | NS                     | NS                     | _____ | _____ |
| <b>No Piñon</b>     | Mort | 0.000483<br>(0.050)   | 0.000518<br>(<0.0001)   | 0.000743<br>(<<0.0001) | 0.00105<br>(<<0.0001)  | _____ | _____ |
|                     | Time | -0.000677<br>(0.0058) | -0.000432<br>(<0.001)   | NS                     | NS                     | _____ | _____ |
| <b>No Lodgepole</b> | Mort | 0.000896<br>(<0.001)  | 0.000628<br>(<<0.0001)  | 0.001058<br>(<<0.0001) | 0.00117<br>(<<0.0001)  | _____ | _____ |
|                     | Time | NS                    | -0.000314<br>(0.017)    | 0.00033529<br>(0.033)  | NS                     | _____ | _____ |
| <b>No Oak</b>       | Mort | 0.000758<br>(0.0031)  | 0.000500<br>(<0.001)    | 0.000900<br>(<<0.0001) | 0.000905<br>(<<0.0001) | _____ | _____ |
|                     | Time | NS                    | -0.000290578<br>(0.024) | 0.000397407<br>(0.018) | NS                     | _____ | _____ |
| <b>No Hemlock</b>   | Mort | 0.000833<br>(<0.001)  | 0.000594<br>(<0.0001)   | 0.000981<br>(<<0.0001) | 0.00109<br>(<<0.0001)  | _____ | _____ |
|                     | Time | NS                    | -0.000306<br>(0.016)    | 0.000330<br>(0.034)    | NS                     | _____ | _____ |
| <b>No Ash</b>       | Mort | 0.000819<br>(0.0010)  | 0.000590<br>(<<0.0001)  | 0.000978<br>(<<0.0001) | 0.00109<br>(<<0.0001)  | _____ | _____ |
|                     | Time | NS                    | -0.000313<br>(0.014)    | 0.000316<br>(0.043)    | NS                     | _____ | _____ |

**Table S3:** Standardized response coefficients and significance levels of trait velocities calculated between the first and last inventory (MPa yr<sup>-1</sup>) and CWD for different forest types, regions, and trait dataset versions including the base version (Base), phylogenetically imputed version (P-imputed), and strict quality control version (Strict Q-control), with and without outliers that drive overdispersion diagnosed using Q-Q plots (OE = outliers excluded). See Methods for further details. Significance values are indicated in parentheses and NS indicates no significant association.

| Forest group      | Base                | Base (OE)             | P-imputed            | P-imputed (OE)        | Strict Q-control   | Strict Q-control (OE) |
|-------------------|---------------------|-----------------------|----------------------|-----------------------|--------------------|-----------------------|
| <b>ΔP50 (MPa)</b> |                     |                       |                      |                       |                    |                       |
| <b>Total</b>      | -0.127<br>(0.00051) | -0.0839<br>(<<0.0001) | -0.159<br>(<0.0001)  | -0.0817<br>(<<0.0001) | -0.0943<br>(0.012) | -0.0628<br>(<0.0001)  |
| <b>Angiosperm</b> | NS                  | NS                    | -0.122<br>(0.0016)   | -0.0504<br>(0.00090)  | NS                 | NS                    |
| <b>Gymnosperm</b> | -0.105<br>(<0.0085) | -0.0706<br>(<<0.0001) | -0.169<br>(<<0.0001) | -0.0415<br>(0.0018)   | -0.0937<br>(0.021) | -0.0836<br>(<<0.0001) |
| <b>West</b>       | -0.109<br>(0.043)   | -0.0524<br>(0.017)    | -0.127<br>(0.010)    | -0.0580<br>(0.010)    | NS                 | -0.0478<br>(0.034)    |
| <b>East</b>       | NS                  | NS                    | NS                   | NS                    | NS                 | NS                    |
| <b>ΔHSM (MPa)</b> |                     |                       |                      |                       |                    |                       |
| <b>Total</b>      | 0.0900<br>(0.024)   | 0.0504<br>(0.0043)    | 0.145<br>(<0.0001)   | 0.0864<br>(<<0.0001)  | _____              | _____                 |
| <b>Angiosperm</b> | NS                  | NS                    | 0.120<br>(0.0019)    | 0.0655<br>(<0.0001)   | _____              | _____                 |
| <b>Gymnosperm</b> | 0.0904<br>(0.038)   | 0.0673<br>(0.00014)   | 0.111<br>(0.0040)    | 0.0948<br>(<<0.0001)  | _____              | _____                 |
| <b>West</b>       | NS                  | NS                    | NS                   | NS                    | _____              | _____                 |
| <b>East</b>       | NS                  | NS                    | NS                   | NS                    | _____              | _____                 |



**Table S4:** Correlation (Spearman's rho) between trait velocities (MPa yr<sup>-1</sup>) in P50 and HSM between the first and last inventory for different forest types calculated using the base version trait dataset. Significance values are indicated in parentheses.

| <b>Forest group</b> | <b>Spearman's rho</b>    |
|---------------------|--------------------------|
| <b>Total</b>        | -0.516<br>( $<<0.0001$ ) |
| <b>Angiosperm</b>   | -0.565<br>( $<<0.0001$ ) |
| <b>Gymnosperm</b>   | -0.460<br>( $<<0.0001$ ) |

**Table S5:** Number of plots included in trait velocity analyses with trait coverage >80% by basal area at the first inventory for different trait dataset versions including the (Base), phylogenetically imputed version (P-imputed), and strict quality control version (Strict Q-control). See Methods for additional details.

| <b>Forest group</b>                                  | <b>Base</b> | <b>P-imputed</b> | <b>Strict Q-control</b> |
|------------------------------------------------------|-------------|------------------|-------------------------|
| <b><math>\Delta P50</math> (MPa yr<sup>-1</sup>)</b> |             |                  |                         |
| <b>Total</b>                                         | 34,874      | 59,842           | 22,614                  |
| <b>Angio</b>                                         | 16,859      | 30,239           | 7,956                   |
| <b>Gymno</b>                                         | 18,015      | 29,603           | 14,658                  |
| <b>West</b>                                          | 6,788       | 12,350           | 5,760                   |
| <b>East</b>                                          | 27,974      | 47,148           | 16,742                  |
| <b>No Piñon</b>                                      | 34,020      | 58,954           | 21,775                  |
| <b>No Lodgepole</b>                                  | 34,350      | 59,177           | 22,092                  |
| <b>No Oak</b>                                        | 31,475      | 53,902           | 22,166                  |
| <b>No Hemlock</b>                                    | 34,442      | 59,075           | 22,278                  |
| <b>No Ash</b>                                        | 34410       | 58,345           | 22,488                  |
| <b><math>\Delta HSM</math> (MPa yr<sup>-1</sup>)</b> |             |                  |                         |
| <b>Total</b>                                         | 16,384      | 45,889           | -                       |
| <b>Angio</b>                                         | 5,797       | 22,283           | -                       |
| <b>Gymno</b>                                         | 10,587      | 23,606           | -                       |
| <b>West</b>                                          | 4,142       | 10,643           | -                       |
| <b>East</b>                                          | 12,183      | 35,170           | -                       |
| <b>No Piñon</b>                                      | 15,873      | 44,942           | -                       |
| <b>No Lodgepole</b>                                  | 15,906      | 45,277           | -                       |
| <b>No Oak</b>                                        | 15,161      | 40,533           | -                       |
| <b>No Hemlock</b>                                    | 16,382      | 45,823           | -                       |
| <b>No Ash</b>                                        | 16,294      | 45,300           | -                       |
